# Supplementary material
Source: Springer Nature journal article supplement (https://www.springermedizin.de/resource/supplementary/12885_2009_2044_MOESM5_ESM.pdf/9460386)

**A**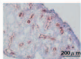**Saline**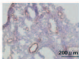**LV-GFP**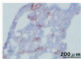**LV-Kallistatin****B**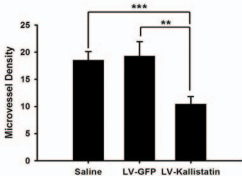

Supplement: MOESM5 [file 9460386]
